# Supplementary material for: Simultaneous mapping of active DNA demethylation and sister chromatid exchange in single cells
Source: PubMed Central journal article supplement — Genes Dev. 2017 Mar 1;31(5):511–23. doi: 10.1101/gad.294843.116 (PMC5393065; doi:10.1101/gad.294843.116), 2017-03-01
Supplement: supp_gad.294843.116_Supplemental_tables.pdf [file supp_gad.294843.116_Supplemental_tables.pdf]

**Table S1 | Mapping statistics of RRBS-based regular, low-input and single-cell MAB-seq**

| Method                                           | Experiment              | Total reads | PF reads after trimming | Uniquely mapped reads | Mapping efficiency | Number of 1×CG | Number of 5×CG |
|--------------------------------------------------|-------------------------|-------------|-------------------------|-----------------------|--------------------|----------------|----------------|
| <b>RRBS-based regular MAB-seq (1 μg DNA)</b>     | Sperm rep1              | 29,822,760  | 28,738,090              | 16,606,280            | 0.578              | 2,598,268      | 966,519        |
|                                                  | Sperm rep2              | 29,282,903  | 26,917,843              | 13,455,072            | 0.500              | 1,380,938      | 966,095        |
|                                                  | shTdg mESC              | 28,908,921  | 27,165,723              | 12,502,602            | 0.460              | 1,125,162      | 758,336        |
| <b>RRBS-based liMAB-seq (~100 diploid cells)</b> | 2-cell embryos          | 35,640,277  | 31,952,632              | 13,907,478            | 0.4353             | 1,659,538      | 995,323        |
|                                                  | shTdg mESC rep2         | 32,707,440  | 29,205,704              | 11,078,150            | 0.3793             | 2,031,985      | 934,280        |
|                                                  | Paternal pronuclei rep1 | 36,014,418  | 30,873,848              | 12,527,439            | 0.4058             | 1,417,107      | 891,785        |
|                                                  | Tet TKO mESC rep2       | 30,005,697  | 27,913,538              | 13,345,063            | 0.4781             | 1,466,108      | 878,947        |
|                                                  | Paternal pronuclei rep2 | 51,459,994  | 33,039,317              | 10,703,204            | 0.3240             | 1,008,455      | 765,432        |
|                                                  | Tet TKO mESC rep1       | 20,720,152  | 19,201,923              | 9,053,976             | 0.4715             | 1,934,988      | 764,281        |
|                                                  | shTdg mESC rep1         | 23,297,580  | 21,636,674              | 10,265,147            | 0.4744             | 1,889,543      | 756,502        |
|                                                  | Dnmt TKO mESC rep2      | 24,568,185  | 22,497,650              | 9,832,898             | 0.4371             | 1,251,116      | 713,976        |
|                                                  | Dnmt TKO mESC rep1      | 31,818,194  | 27,535,402              | 10,020,554            | 0.3639             | 1,012,523      | 596,356        |
| <b>RRBS-based</b>                                | Tet TKO mESC            | 21,574,462  | 19,334,066              | 7,423,872             | 0.384              | 480,210        | 421,649        |

| scMAB-seq | shTdg mESC        | 35,237,615 | 29,328,097 | 13,013,857 | 0.444 | 439,729 | 384,426 |
|-----------|-------------------|------------|------------|------------|-------|---------|---------|
|           | shTdg mESC        | 17,576,284 | 14,544,392 | 6,177,465  | 0.425 | 360,136 | 284,590 |
|           | shTdg mESC        | 21,114,069 | 16,574,750 | 6,577,015  | 0.397 | 437,599 | 272,443 |
|           | Tet TKO mESC      | 35,517,471 | 27,866,527 | 9,911,731  | 0.356 | 285,858 | 199,704 |
|           | shTdg mESC        | 17,566,012 | 14,100,383 | 5,341,181  | 0.379 | 217,691 | 193,710 |
|           | shTdg mESC        | 18,725,584 | 13,310,417 | 4,981,658  | 0.374 | 206,623 | 179,259 |
|           | shTdg mESC        | 19,982,722 | 15,074,769 | 6,290,954  | 0.417 | 237,457 | 178,104 |
|           | shTdg mESC        | 18,964,678 | 13,601,420 | 4,004,439  | 0.294 | 245,814 | 176,566 |
|           | shTdg mESC        | 19,093,335 | 14,497,019 | 4,943,628  | 0.341 | 238,184 | 165,249 |
|           | 2-cell blastomere | 31,649,330 | 23,668,009 | 8,553,326  | 0.361 | 211,703 | 157,679 |
|           | 4-cell blastomere | 11,412,663 | 8,482,794  | 2,171,010  | 0.256 | 210,281 | 156,341 |
|           | shTdg mESC        | 40,899,978 | 30,492,794 | 11,475,900 | 0.376 | 222,725 | 153,755 |
|           | shTdg mESC        | 18,911,106 | 14,293,291 | 3,732,004  | 0.261 | 163,951 | 144,859 |
|           | 2-cell blastomere | 19,086,346 | 15,514,778 | 5,713,036  | 0.368 | 175,121 | 140,792 |
|           | 2-cell blastomere | 18,270,341 | 14,835,647 | 4,744,635  | 0.320 | 170,154 | 140,466 |
|           | 4-cell blastomere | 11,172,491 | 7,889,004  | 2,495,648  | 0.316 | 188,420 | 139,933 |
|           | 2-cell blastomere | 17,354,821 | 14,075,671 | 5,145,670  | 0.366 | 157,082 | 139,850 |
|           | 4-cell blastomere | 10,721,500 | 7,770,324  | 2,183,668  | 0.281 | 175,480 | 136,719 |

|                   |            |            |           |       |         |         |
|-------------------|------------|------------|-----------|-------|---------|---------|
| 2-cell blastomere | 18,112,141 | 12,952,144 | 3,143,347 | 0.243 | 151,410 | 128,455 |
| 2-cell blastomere | 31,466,481 | 15,725,860 | 6,220,382 | 0.396 | 152,497 | 125,772 |
| 2-cell blastomere | 30,879,267 | 21,307,958 | 3,545,059 | 0.166 | 153,881 | 125,095 |
| Tet TKO mESC      | 20,493,844 | 14,763,476 | 5,788,015 | 0.392 | 184,302 | 119,621 |
| 2-cell blastomere | 19,389,934 | 11,368,138 | 3,037,307 | 0.267 | 131,870 | 111,172 |
| Tet TKO mESC      | 15,830,015 | 12,776,248 | 3,470,479 | 0.272 | 151,070 | 111,063 |
| 2-cell blastomere | 24,781,049 | 20,542,784 | 8,059,263 | 0.392 | 139,317 | 110,726 |
| 2-cell blastomere | 25,160,848 | 20,678,581 | 5,994,340 | 0.290 | 139,794 | 108,510 |
| 2-cell blastomere | 19,836,447 | 15,847,026 | 4,698,879 | 0.297 | 156,016 | 108,436 |
| 2-cell blastomere | 19,679,898 | 16,081,885 | 4,761,718 | 0.296 | 162,213 | 108,271 |
| 2-cell blastomere | 12,567,568 | 10,047,141 | 3,174,735 | 0.316 | 149,664 | 105,990 |
| 2-cell blastomere | 15,559,143 | 10,953,254 | 3,251,724 | 0.297 | 118,926 | 104,215 |
| 2-cell blastomere | 14,480,356 | 11,058,523 | 3,893,824 | 0.352 | 150,970 | 102,633 |
| 2-cell blastomere | 16,030,786 | 11,045,878 | 3,861,295 | 0.350 | 148,250 | 102,491 |

|                   |            |            |           |       |         |         |
|-------------------|------------|------------|-----------|-------|---------|---------|
| 2-cell blastomere | 24,955,952 | 19,497,636 | 6,627,878 | 0.340 | 136,881 | 101,833 |
| 4-cell blastomere | 11,175,604 | 6,272,960  | 1,398,458 | 0.223 | 124,601 | 101,821 |
| 2-cell blastomere | 18,342,887 | 13,949,330 | 4,177,662 | 0.299 | 161,713 | 100,019 |
| 2-cell blastomere | 23,584,661 | 19,317,452 | 5,567,865 | 0.288 | 136,795 | 98,721  |
| 2-cell blastomere | 13,503,781 | 10,301,424 | 2,390,977 | 0.232 | 148,443 | 95,988  |
| 2-cell blastomere | 16,613,789 | 12,827,855 | 4,486,767 | 0.350 | 129,737 | 93,895  |
| 2-cell blastomere | 15,296,830 | 12,615,030 | 3,949,754 | 0.313 | 142,998 | 92,229  |
| 2-cell blastomere | 14,654,707 | 11,862,856 | 4,587,690 | 0.387 | 131,842 | 91,148  |
| 2-cell blastomere | 15,187,820 | 12,635,338 | 4,187,961 | 0.331 | 141,729 | 90,497  |
| 2-cell blastomere | 17,678,818 | 15,418,582 | 5,679,811 | 0.368 | 139,748 | 89,739  |
| 2-cell blastomere | 12,099,785 | 9,670,289  | 3,349,756 | 0.346 | 131,093 | 86,595  |
| 4-cell blastomere | 11,048,205 | 9,176,965  | 456,875   | 0.050 | 151,555 | 85,174  |
| 4-cell blastomere | 12,244,028 | 8,454,203  | 2,692,643 | 0.318 | 118,029 | 82,300  |
| 4-cell blastomere | 11,819,631 | 7,466,731  | 2,195,684 | 0.294 | 106,305 | 81,643  |

|                   |            |            |           |       |        |        |
|-------------------|------------|------------|-----------|-------|--------|--------|
| 4-cell blastomere | 13,121,379 | 7,808,799  | 2,579,086 | 0.330 | 98,145 | 71,902 |
| 2-cell blastomere | 13,559,000 | 10,528,203 | 3,259,547 | 0.310 | 93,634 | 56,231 |

**Table S1 | Mapping statistics of RRBS-based regular, low-input and single-cell MAB-seq.** For regular MAB-seq, 1  $\mu$ g genomic DNA was used as the starting material. For low-input MAB-seq (liMAB-seq), around 100 diploid cells were used (in the case of the paternal pronuclei which are haploid, around 150 paternal pronuclei were used). For single-cell MAB-seq (scMAB-seq), a single cell was used. 1 $\times$ CG and 5 $\times$ CG refer to CpG sites covered for at least 1 time and 5 times by sequencing, respectively. For each method, the samples were sorted by the number of 5 $\times$ CG.

**Table S2 | Increased CpG coverage using longer sequencing length**

| scMAB-seq sample | Number of reads | Number of 1×CG |        | Number of 5×CG |        | Number of 10×CG |        |
|------------------|-----------------|----------------|--------|----------------|--------|-----------------|--------|
|                  |                 | SE 100         | SE 250 | SE 100         | SE 250 | SE 100          | SE 250 |
| 1                | 14183724        | 411425         | 590004 | 386658         | 502038 | 325798          | 438787 |
| 2                | 19982722        | 237457         | 349383 | 178104         | 249946 | 170509          | 236627 |
| 3                | 18112141        | 151410         | 215121 | 128455         | 178726 | 121910          | 167205 |
| 4                | 19389934        | 131870         | 191898 | 111172         | 157666 | 104029          | 145112 |

**Table S2 | Increased CpG coverage using longer sequencing length.** Four RRBS-based scMAB-seq libraries were sequenced in single-end 250 bp (SE 250) mode. The SE 250 data were compared with the same data trimmed to 100 bp (SE 100). The analysis suggested that when necessary, longer sequencing length can help recover more CpG sites.

**Table S3 | Increased CpG coverage using pair-end sequencing**

| scMAB-seq sample | Number of reads | Number of 1×CG |        | Number of 5×CG |        | Number of 10×CG |        |
|------------------|-----------------|----------------|--------|----------------|--------|-----------------|--------|
|                  |                 | SE 100         | PE 100 | SE 100         | PE 100 | SE 100          | PE 100 |
| 1                | 17566012        | 217691         | 452392 | 193710         | 326490 | 186341          | 296856 |
| 2                | 18911106        | 163951         | 354656 | 144859         | 243562 | 138520          | 219834 |
| 3                | 9131030         | 149555         | 315158 | 135070         | 222066 | 126754          | 198910 |
| 4                | 8305919         | 113003         | 244364 | 99968          | 198794 | 92499           | 146575 |

**Table S3 | Increased CpG coverage using pair-end sequencing.** Four RRBS-based scMAB-seq libraries were sequenced in pair-end 100 bp (PE 100) mode. The PE 100 data were compared with the same data using only read 1 (SE 100). The analysis suggested that when necessary, performing pair-end sequencing can help recover more CpG sites.

**Table S4 | Mapping statistics of PBAT-based low-input and single-cell MAB-seq**

| <b>Method</b>                                    | <b>Experiment</b> | <b>Total reads</b> | <b>PF reads after trimming</b> | <b>Uniquely mapped reads</b> | <b>Mapping efficiency</b> | <b>PCR duplication rate</b> | <b>Number of 1×CG</b> |
|--------------------------------------------------|-------------------|--------------------|--------------------------------|------------------------------|---------------------------|-----------------------------|-----------------------|
| <b>PBAT-based liMAB-seq (~100 diploid cells)</b> | shTdg mESC        | 256,302,036        | 251,815,145                    | 106,783,752                  | 0.424                     | 0.127                       | 25,253,604            |
|                                                  | TKO mESC          | 27,859,841         | 27,429,466                     | 11,884,783                   | 0.433                     | 0.034                       | 8,196,246             |
| <b>PBAT-based scMAB-seq</b>                      | Tet TKO mESC      | 30,800,116         | 30,033,906                     | 10,624,469                   | 0.354                     | 0.135                       | 6,086,412             |
|                                                  | shTdg mESC        | 31,195,776         | 30,274,887                     | 7,211,236                    | 0.238                     | 0.111                       | 4,339,008             |
|                                                  | Tet TKO mESC      | 20,309,317         | 19,720,899                     | 5,344,165                    | 0.271                     | 0.077                       | 3,636,782             |
|                                                  | shTdg mESC        | 29,817,145         | 28,765,221                     | 5,018,444                    | 0.174                     | 0.084                       | 3,183,118             |
|                                                  | Tet TKO mESC      | 18,876,465         | 18,329,827                     | 4,259,691                    | 0.232                     | 0.067                       | 2,987,072             |
|                                                  | shTdg mESC        | 28,786,036         | 27,449,771                     | 3,943,879                    | 0.144                     | 0.122                       | 2,335,982             |
|                                                  | 4-cell blastomere | 16,032,132         | 15,586,920                     | 3,812,399                    | 0.245                     | 0.177                       | 2,267,937             |
|                                                  | 4-cell blastomere | 13,226,779         | 12,816,582                     | 2,909,310                    | 0.227                     | 0.151                       | 1,834,911             |
|                                                  | 4-cell blastomere | 14,986,634         | 14,572,877                     | 3,184,182                    | 0.219                     | 0.191                       | 1,834,503             |
|                                                  | shTdg mESC        | 26,682,776         | 25,785,216                     | 2,329,210                    | 0.090                     | 0.077                       | 1,674,503             |
|                                                  | 4-cell blastomere | 9,566,516          | 9,249,967                      | 1,940,987                    | 0.210                     | 0.122                       | 1,374,069             |



**Table S4 | Mapping statistics of PBAT-based low-input and single-cell MAB-seq.** For low-input MAB-seq (liMAB-seq), around 100 diploid cells were used. For single-cell MAB-seq (scMAB-seq), a single cell was used. 1×CG refers to CpG sites covered for at least 1 time by sequencing. For each method, the samples were sorted by the number of 1×CG.
