# Supplementary figures and images for: Simultaneous mapping of active DNA demethylation and sister chromatid exchange in single cells
Source: PubMed Central journal article supplement — Genes Dev. 2017 Mar 1;31(5):511–23. doi: 10.1101/gad.294843.116 (PMC5393065; doi:10.1101/gad.294843.116), 2017-03-01

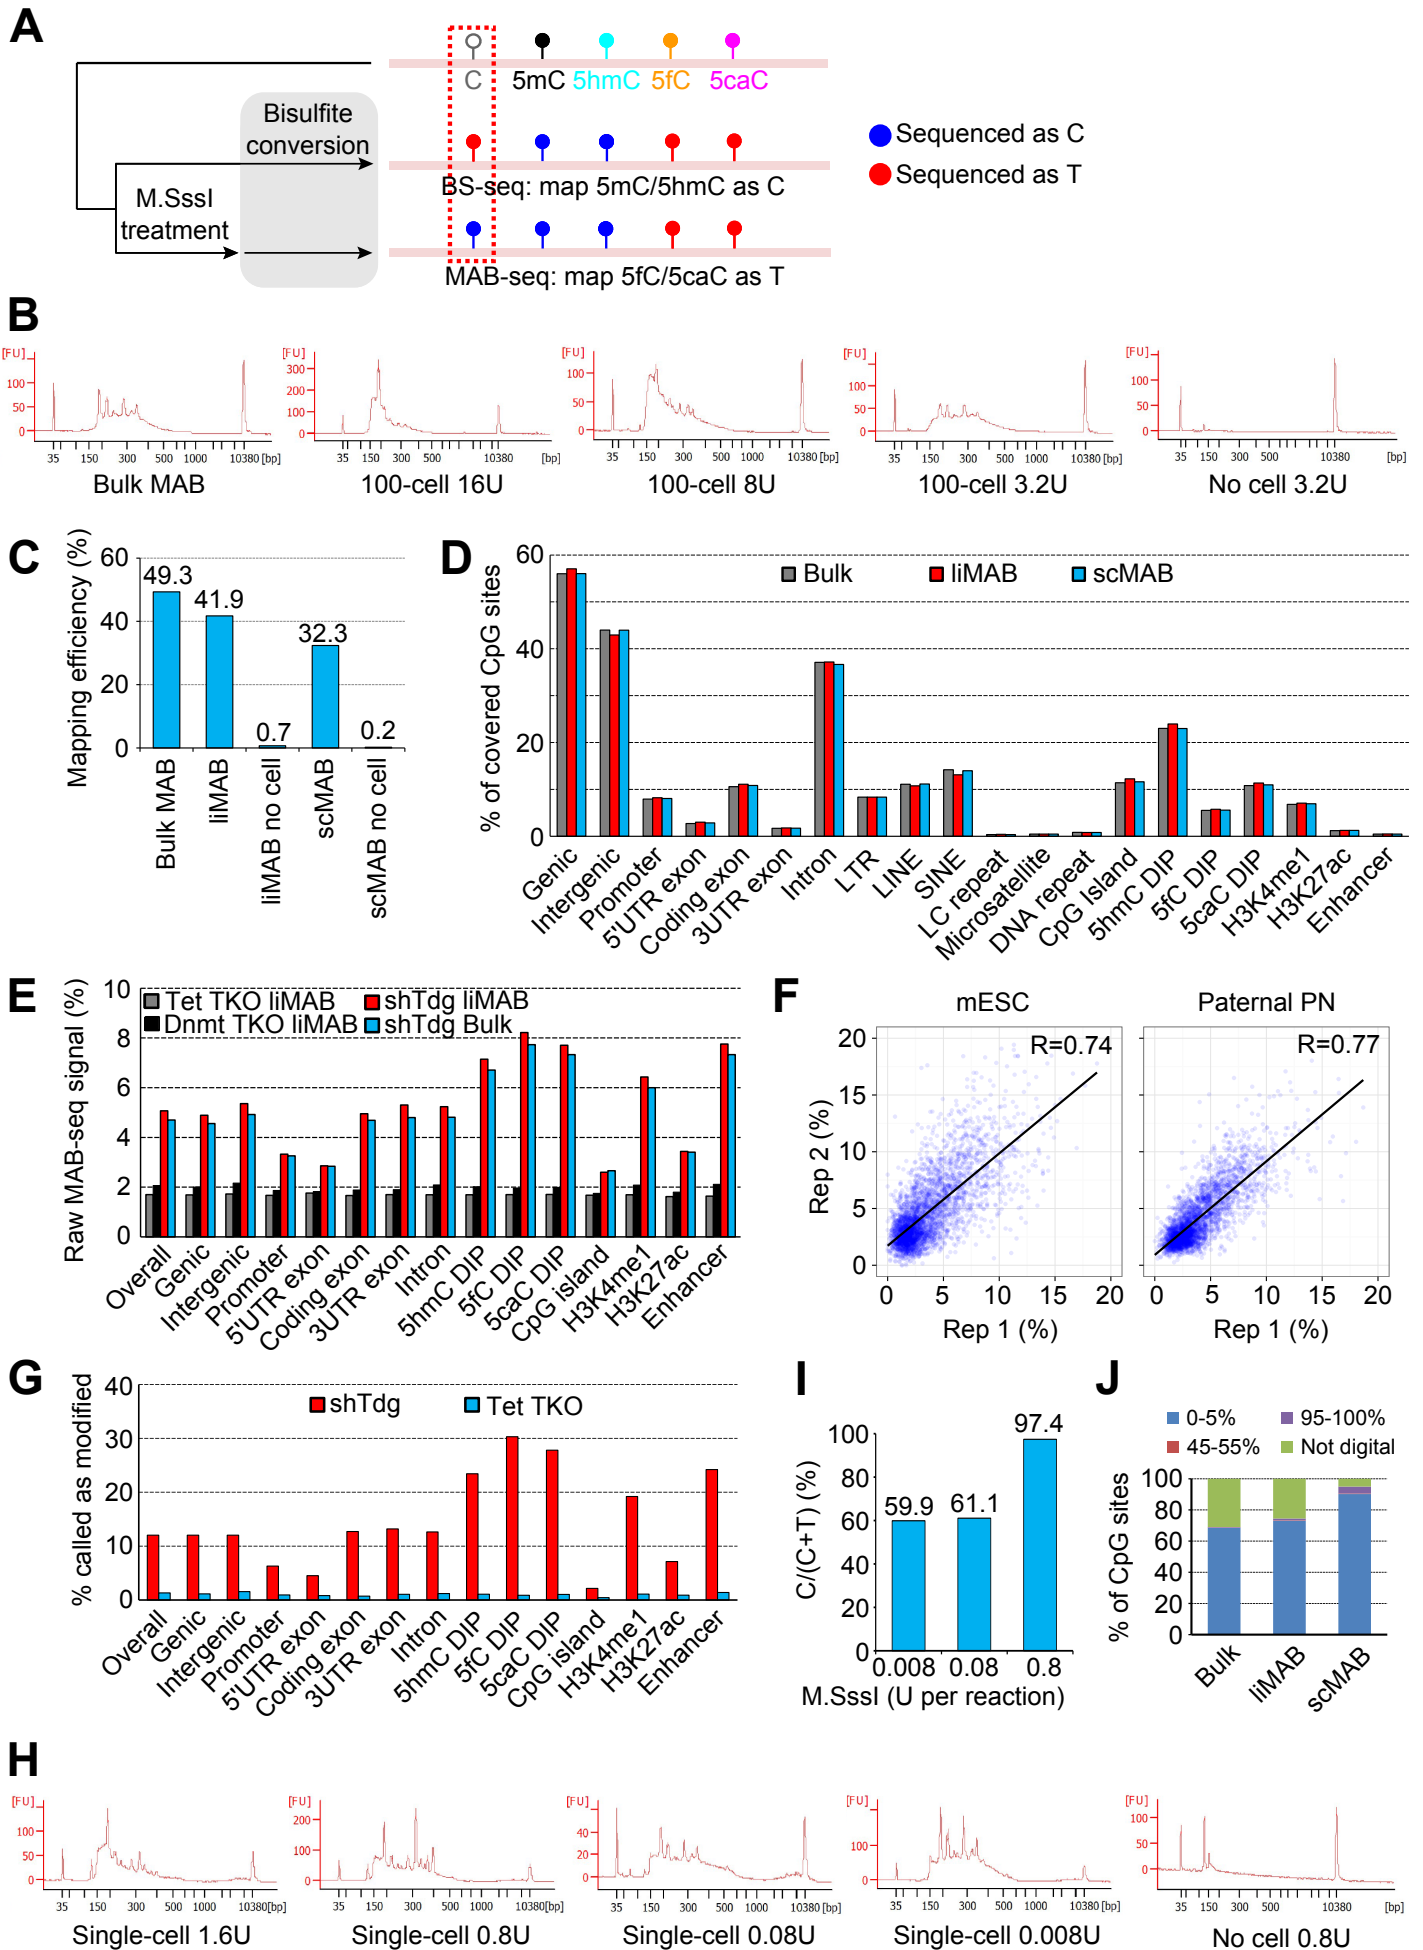

**A**

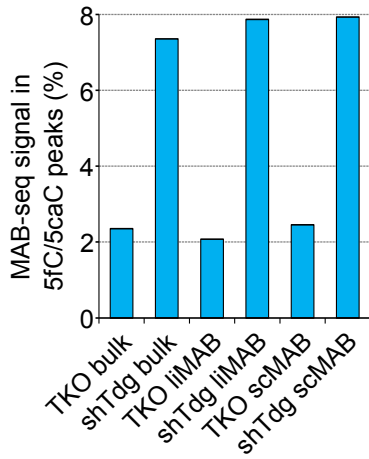

**B**

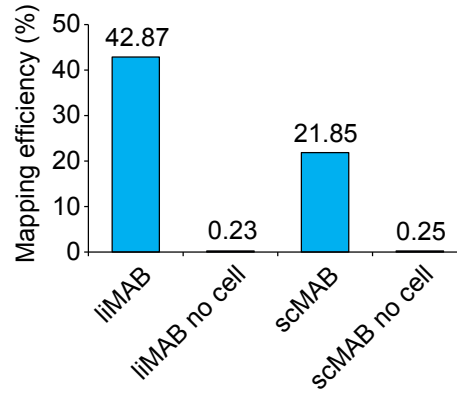

**C**

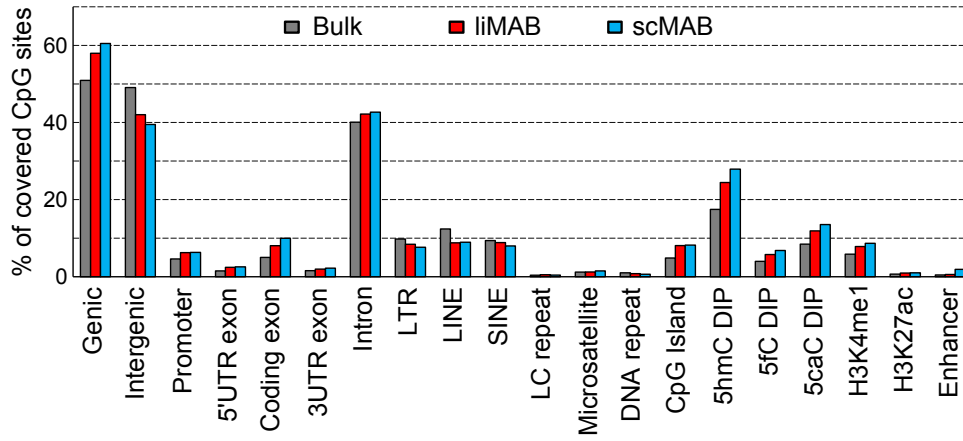

**D**

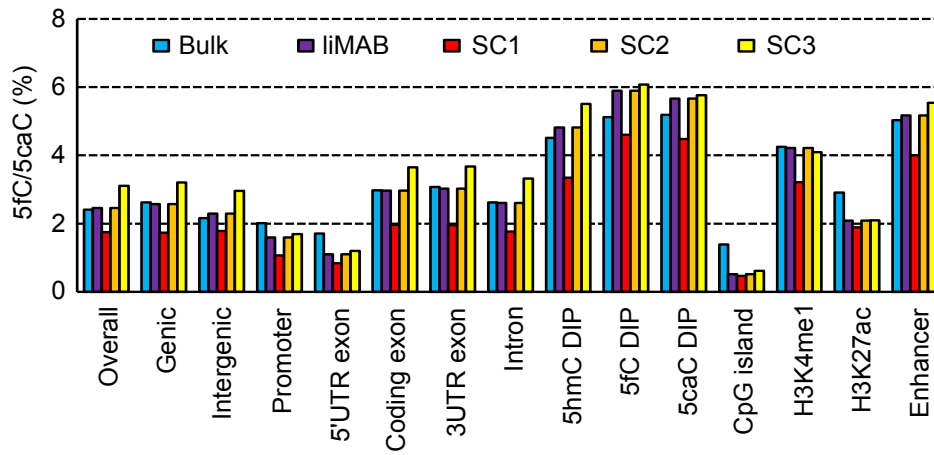

**A**

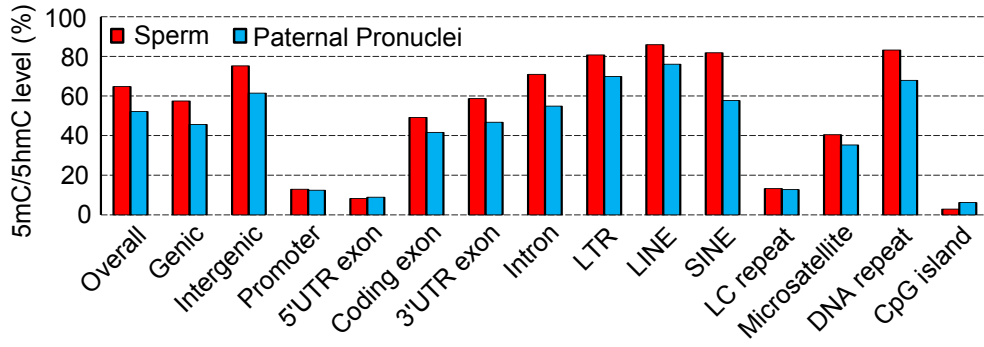

**B**

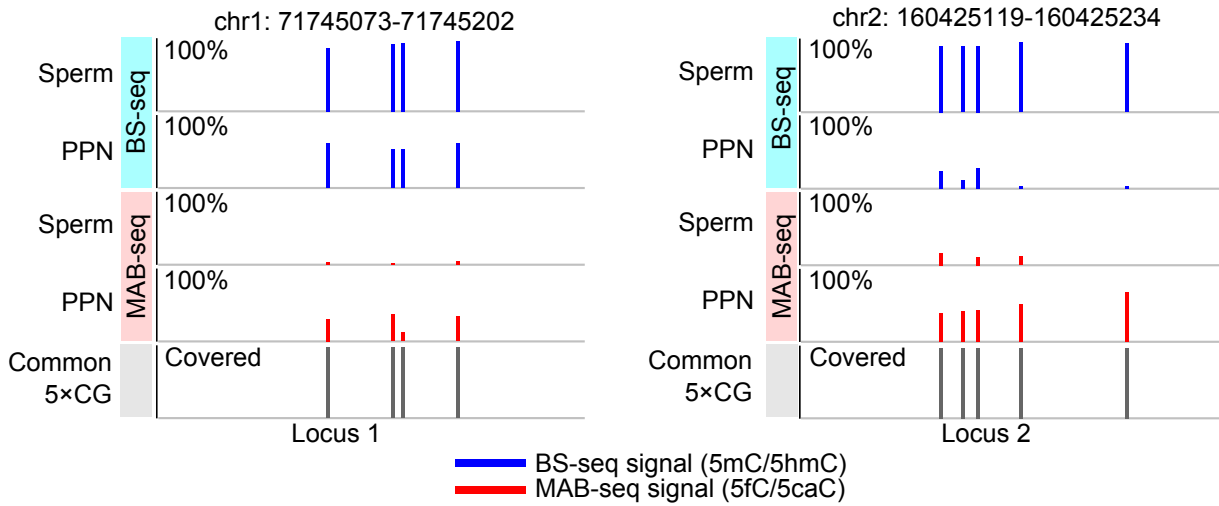

**C**

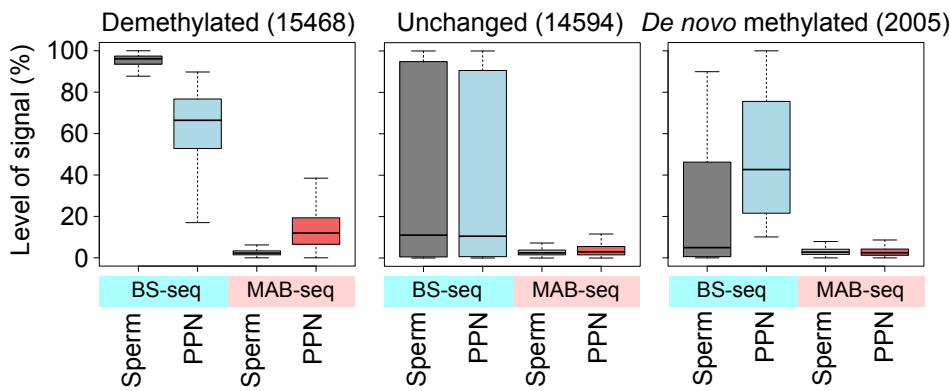

**D**

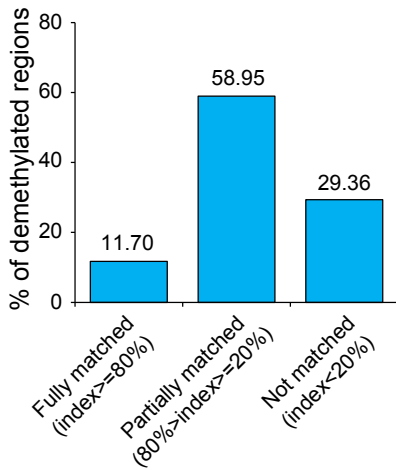

**E**

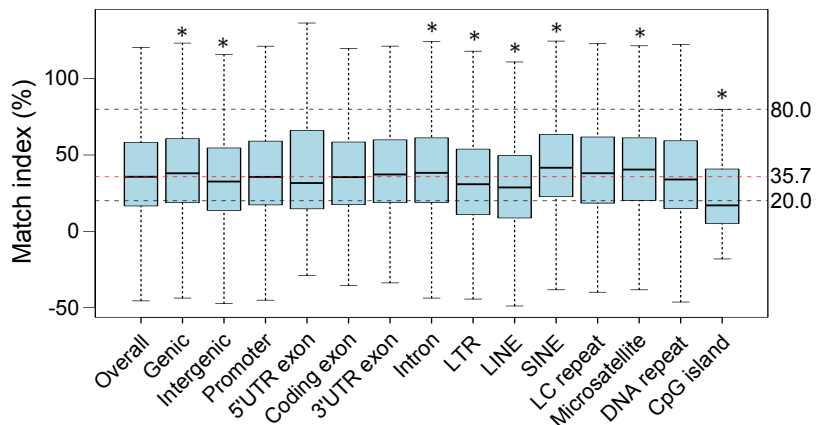

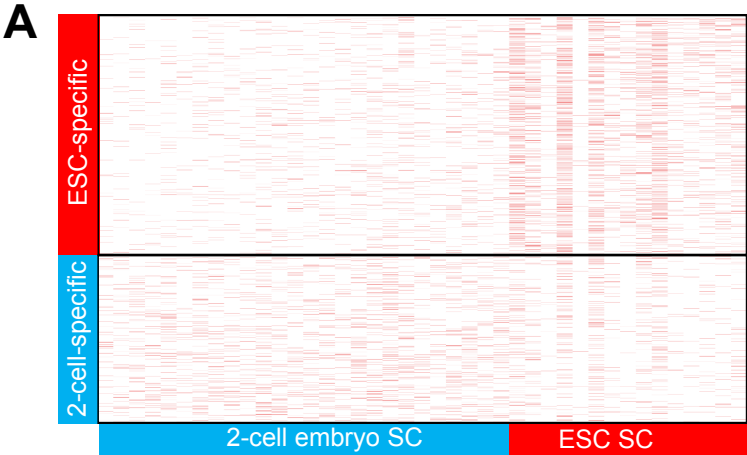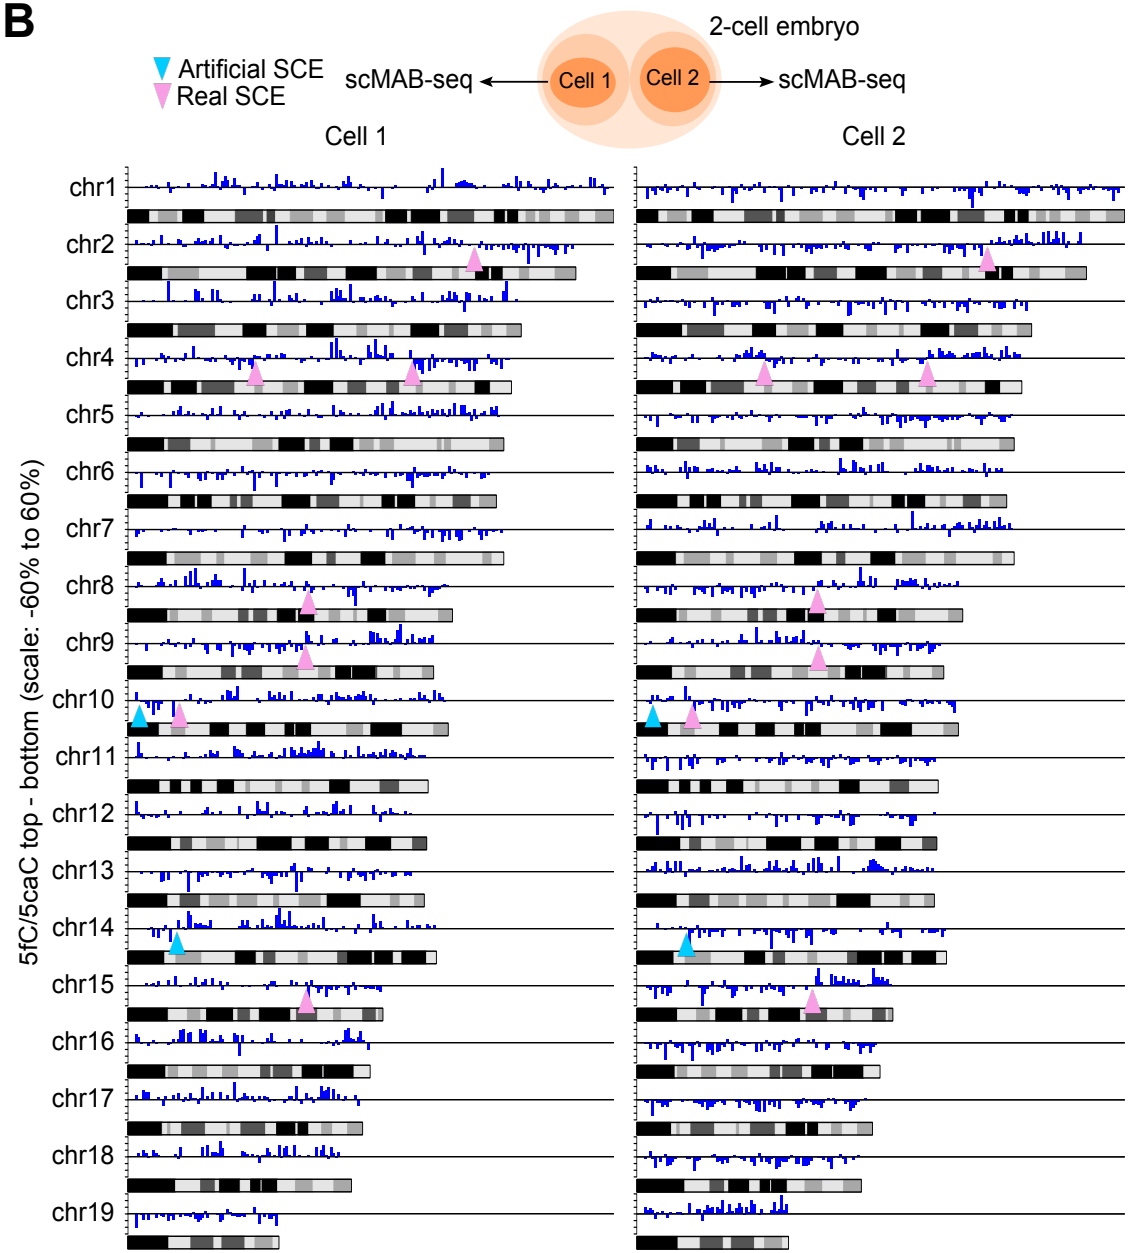

**A**

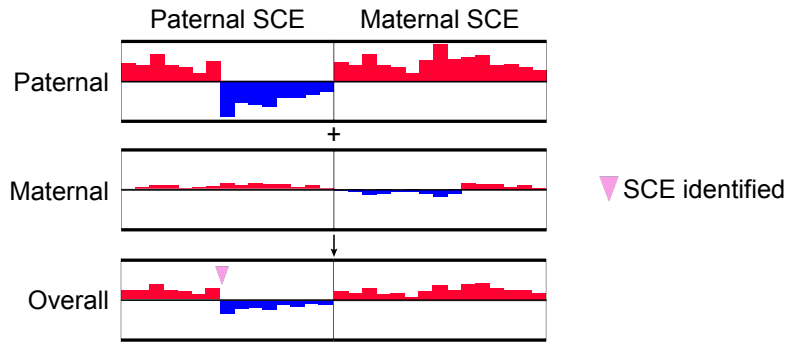

**B**

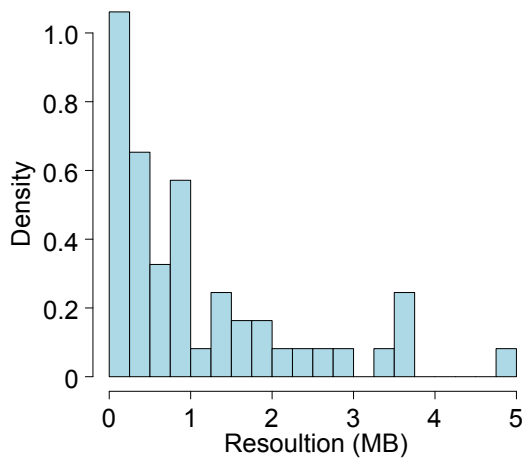

**C**

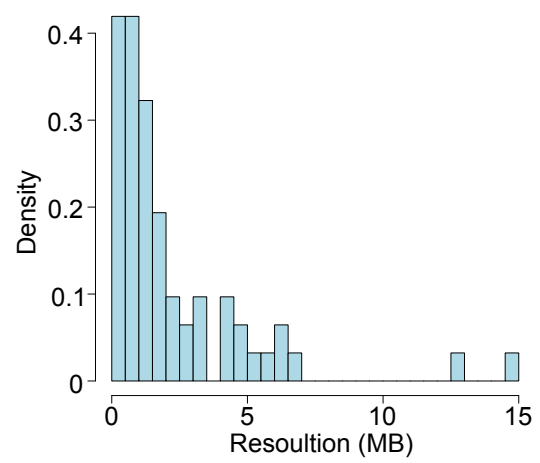

**D**

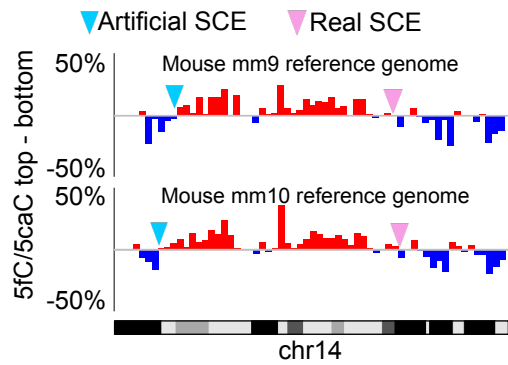

**E**

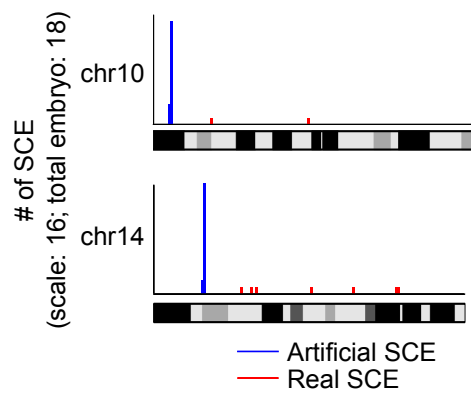

A

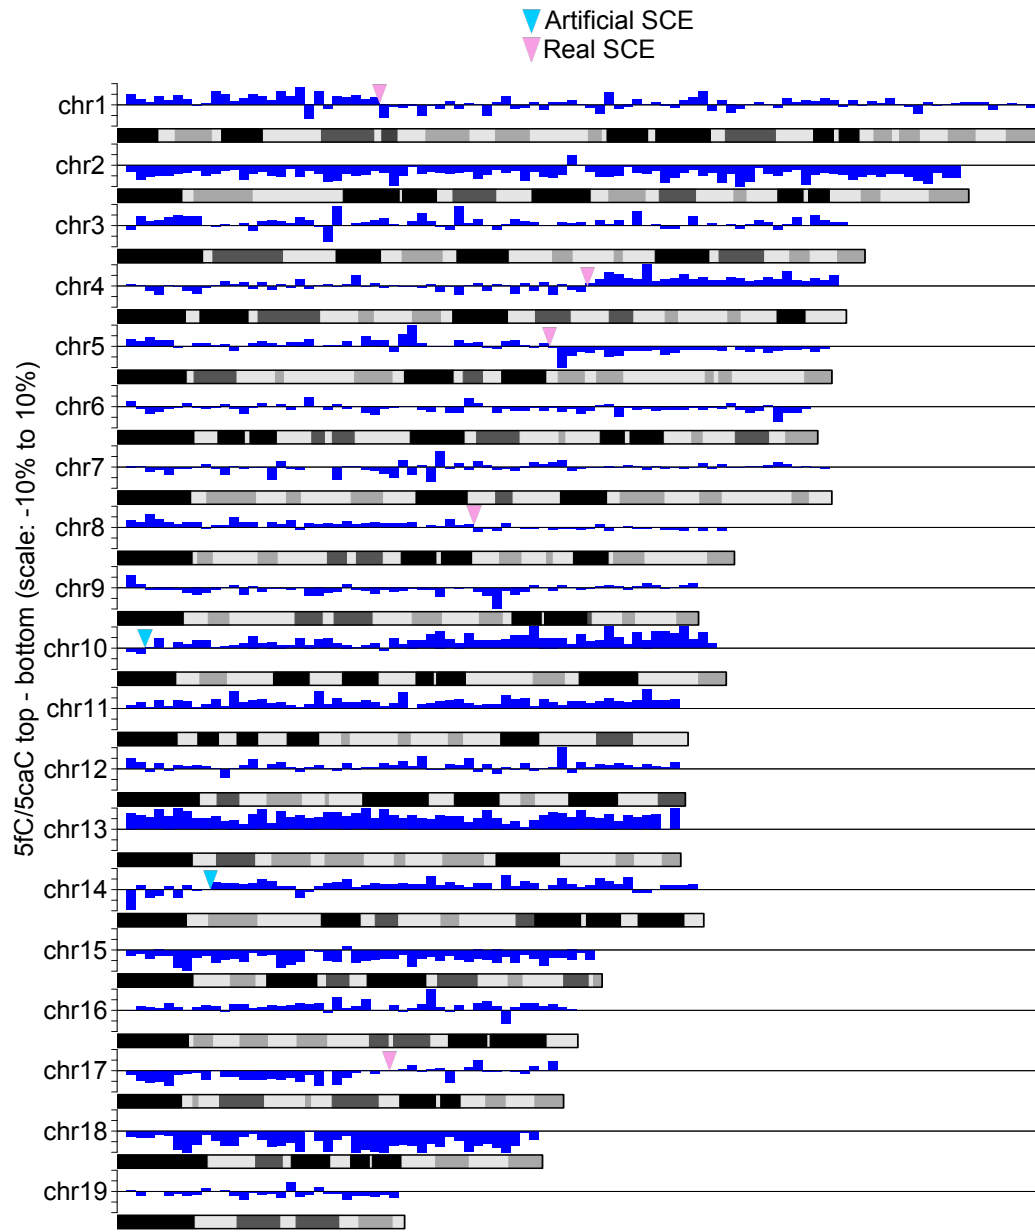

Supplement: supp_gad.294843.116_Supplemental_figures.pdf [file supp_gad.294843.116_Supplemental_figures.pdf]
